# Supplementary material
Source: Elsevier journal article supplement (https://www.sciencedirect.com/science/article/pii/S0211139X18305894)
Supplement: mmc1 [file S0211139X18305894:mmc1.pdf]

# **APÉNDICE A- LISTADO DE PRESCRIPCIONES POTENCIALES INAPROPIADAS (PPI)**

## **Estudio polimedicado Comarca Gipuzkoa 2014**

| Nº PPI | Medicamentos Implicados                                                                                                                                                      | Fuente                                                 | Razón para la evaluación                                                                                                                                                                          | Manejo Clínico                                                                                                                                                                                                                                                                    |
|--------|------------------------------------------------------------------------------------------------------------------------------------------------------------------------------|--------------------------------------------------------|---------------------------------------------------------------------------------------------------------------------------------------------------------------------------------------------------|-----------------------------------------------------------------------------------------------------------------------------------------------------------------------------------------------------------------------------------------------------------------------------------|
| 1      | <b>Metoclopramida, domperidona</b>                                                                                                                                           | Alerta AEMPS<br><br>Prescrire 2014                     | -Metoclopramida produce efectos adversos (EA) neurológicos (disquinesias), menos efectos adversos cardiovasculares (CV).<br>-Domperidona: EA cardiovasculares (arritmias), menos EA neurológicos. | Alternativas:<br>-Reflujo, dispepsia: IBP<br>-Antiemético: metoclopramida más segura a nivel CV, domperidona a nivel extrapiramidal.                                                                                                                                              |
| 2      | <b>Aspirina en prevención primaria</b>                                                                                                                                       | STOPP BEERS<br>Scottish 2012<br>BEERS<br>Scottish 2012 | Falta de evidencia de beneficio vs riesgo en > 80 años en prevención primaria.<br><br>Diabetes: actualmente no recomendado.                                                                       | Valorar indicación. Puede deberse a falta de registro (cardiopatía isquémica, ictus, EAP...) o a cambio en la evidencia (en su día era un Tto recomendado en prevención 1ª de pacientes de alto riesgo).                                                                          |
| 3      | <b>AINE en insuficiencia cardiaca</b>                                                                                                                                        | BEERS<br>STOPP                                         | Riesgo de empeoramiento de la insuficiencia cardiaca                                                                                                                                              | Evitar. Sustituir por analgésico (paracetamol)                                                                                                                                                                                                                                    |
| 4      | <b>Duplicidad de AINE</b>                                                                                                                                                    | STOPP                                                  | Aumentan los efectos adversos                                                                                                                                                                     | Sustituir un AINE por paracetamol. Dejar solo un AINE                                                                                                                                                                                                                             |
| 5      | <b>Sysadua: diacereina, glucosamina, condroitina</b>                                                                                                                         | Prescrire 2014<br><br>Alertas AEMPS                    | Eficacia marginal.<br>-Diacereina: EA: GI, cutáneos graves y hepatitis.<br>-Glucosamina: reacciones alérgicas y trastornos hepáticos.<br>-Condroitina: suplemento dietético en otros países.      | Paracetamol es el analgésico de elección para la artrosis. Sysadua: sin beneficios significativos en dolor, funcionalidad y progresión de la enfermedad, con riesgos importantes.                                                                                                 |
| 6      | <b>Benzodiazepinas (BZD) de acción larga (t 1/2&gt;12h):</b><br>clobazam, cloracepato dipotásico, clordiazepóxido, diazepam, flunitrazepam, flurazepam, ketazolam, quazepam. | STOPP<br><br>BEERS                                     | Sedación excesiva, confusión, deterioro de memoria, inestabilidad, caídas.<br><br>El uso de BDZ se asocia a mayor riesgo de fractura de cadera, demencia e incluso de mortalidad.                 | Insomnio: preferibles otras BZD, uso en periodos cortos (2-6 semanas), a demanda, bajar dosis, retirada, valorar el riesgo de caídas y el uso de otros fármacos sedantes.<br><br>Ansiedad: utilizarlos durante periodos cortos (2-6 semanas). Reducir dosis: opción más factible. |
| 7      | <b>Duplicidad de benzodiazepinas</b>                                                                                                                                         | STOPP                                                  | Exceso de sedación, riesgo de caídas y fracturas                                                                                                                                                  | Evitar, reducir dosis, adecuar pauta. Valorar riesgo de caídas.                                                                                                                                                                                                                   |

**APENDICE A. LISTADO DE PRESCRIPCIONES POTENCIALES INAPROPIADAS (PPI)**  
**Estudio polimedicado Comarca Gipuzkoa 2014**

| Nº PPI | Medicamentos Implicados                                                                                  | Fuente                                      | Razón para la evaluación                                                                                                                                                                     | Manejo Clínico                                                                                                                                             |
|--------|----------------------------------------------------------------------------------------------------------|---------------------------------------------|----------------------------------------------------------------------------------------------------------------------------------------------------------------------------------------------|------------------------------------------------------------------------------------------------------------------------------------------------------------|
| 8      | Zolpidem dosis > 5 mg/día                                                                                | Alerta AEMPS                                | Riesgos: somnolencia diurna, descoordinación motora, pérdida memoria, accidentes de tráfico y caídas.                                                                                        | En ancianos utilizar la dosis de zolpidem 5 mg/día. Usar durante el menor tiempo posible o a demanda.                                                      |
| 9      | Antihistamínicos primera generación (acción anticolinérgica): dexclorfeniramina, mepiramina, hidroxicina | BEERS<br>STOPP                              | Producen efectos secundarios de tipo anticolinérgico.                                                                                                                                        | Limitar a 10 días. Utilizar antihistamínicos menos anticolinérgicos (como cetirizina, loratadina, etc). Revisar la indicación y duración.                  |
| 10     | IECA + ARA II o aliskiren (cualquier combinación)                                                        | Alertas AEMPS<br>STOPP                      | Aumenta el riesgo de hiperpotasemia, hipotensión y fallo renal, sin ventajas sobre la morbilidad cardiovascular.                                                                             | No se recomienda el uso de la terapia combinada de IECA con ARA II.                                                                                        |
| 11     | Triple whammy: AINE + (IECA o ARA II)+ Diuretico                                                         | Scottish 2012<br>INFAC 2014                 | La asociación de IECA (o ARA II o aliskiren) con diuréticos y AINE (incluyendo los COX-2) puede producir fallo renal                                                                         | Evitar siempre que sea posible. Evitar si insuficiencia renal.                                                                                             |
| 12     | AINE + anticoagulantes                                                                                   | STOPP<br>BEERS                              | Aumenta el riesgo de sangrado                                                                                                                                                                | Valorar la necesidad del AINE y la sustitución por paracetamol                                                                                             |
| 13     | AINE + antiagregantes                                                                                    | BEERS                                       | Aumenta riesgo de sangrado                                                                                                                                                                   | Valorar la necesidad del AINE y la sustitución por paracetamol                                                                                             |
| 14     | Doble antiagregación durante más de 1 año (AAS + Clopidogrel)                                            | Scottish 2012<br>STOPP<br>SEMFYC "No Hacer" | Aumenta el riesgo de sangrado, sin beneficios aparentes. Las guías proponen una duración de 9-12 meses. Evidencia de baja calidad sobre posible beneficio en enfermedad arterial periférica. | Valorar al año tras angioplastia con implantación de stent. Mantener la aspirina y quitar clopidogrel. Quizás continuar si enfermedad arterial periférica. |
| 15     | Bisfosfonatos durante más de 5 años                                                                      | Alerta AEMPS                                | Aumento de riesgo de fracturas atípicas de fémur.                                                                                                                                            | Discontinuar. En caso de fracturas vertebrales o de cadera previas (prevención secundaria), se puede ampliar a otros 5 años.                               |

**Prescripciones Potencialmente Inapropiadas (PPI):** ayudan a identificar un posible problema, pero no implican necesariamente que haya que modificarlo. Es el médico, según su criterio clínico, quien decide si en el PACIENTE CONCRETO hay más riesgos que beneficios, o si existen otras alternativas posibles.
